# Supplementary material for: Early Vitamin C, Hydrocortisone, and Thiamine Treatment for Septic Cardiomyopathy: A Propensity Score Analysis
Source: MDPI journal article supplement (doi:10.3390/jpm11070610), 2021-06-28
Supplement: s1 [file s1]

**Table S1.** Factors used to generate the propensity scores for the conditional probability that the patients would receive the vitamin C protocol.

|                           | <b>Odds ratio (95% confidence interval)</b> | <b><i>p</i></b> |
|---------------------------|---------------------------------------------|-----------------|
| Age                       | 1.02 (0.99–1.06)                            | 0.12            |
| Male sex                  | 2.91 (1.32–6.40)                            | 0.01            |
| Body mass index           | 0.99 (0.89–1.09)                            | 0.78            |
| Diabetes                  | 0.56 (0.26–1.23)                            | 0.15            |
| Nosocomial infection      | 1.04 (0.45–2.37)                            | 0.93            |
| Pneumonia                 | 0.50 (0.22–1.14)                            | 0.10            |
| SOFA score                | 0.93 (0.74–1.16)                            | 0.50            |
| Mechanical ventilation    | 3.22 (0.94–11.10)                           | 0.06            |
| Renal replacement therapy | 1.53 (0.59–3.96)                            | 0.38            |
| Body temperature          | 0.69 (0.43–1.11)                            | 0.13            |
| Mean arterial pressure    | 1.00 (0.97–1.04)                            | 0.86            |
| Glasgow Coma Scale        | 0.99 (0.84–1.15)                            | 0.85            |
| PaCO <sub>2</sub>         | 0.98 (0.94–1.03)                            | 0.48            |
| Bicarbonate               | 1.14 (1.03–1.26)                            | 0.01            |
| Potassium                 | 0.77 (0.50–1.19)                            | 0.24            |
| Creatinine                | 0.90 (0.70–1.16)                            | 0.42            |
| Platelet count            | 1.00 (1.00–1.01)                            | 0.71            |

The propensity scores were generated using variables with *p*-values of <0.20 (comparing treatment and control groups) and potential confounders that were judged based on clinical expertise. PaCO<sub>2</sub>: arterial partial pressure of carbon dioxide; SOFA: Sequential Organ Failure Assessment.

**Table S2.** Baseline characteristics of the groups before matching.

|                                                 | <b>Treatment group<br/>(n = 91)</b> | <b>Control group<br/>(n = 75)</b> | <b>p</b> |
|-------------------------------------------------|-------------------------------------|-----------------------------------|----------|
| Age, years                                      | 77 (70–84)                          | 73 (64–81)                        | 0.054    |
| Male sex                                        | 56 (62)                             | 32 (43)                           | 0.02     |
| Body mass index, kg/m <sup>2</sup>              | 20.0 (18.4–23.0)                    | 21.2 (18.9–24.2)                  | 0.04     |
| Comorbidities                                   |                                     |                                   |          |
| Diabetes                                        | 29 (32)                             | 35 (47)                           | 0.051    |
| Chronic heart failure                           | 8 (9)                               | 8 (11)                            | 0.68     |
| Chronic lung disease                            | 15 (17)                             | 10 (13)                           | 0.57     |
| Liver cirrhosis                                 | 7 (8)                               | 8 (11)                            | 0.51     |
| Chronic kidney disease                          | 21 (23)                             | 20 (27)                           | 0.59     |
| Malignancy                                      | 18 (20)                             | 10 (13)                           | 0.27     |
| Immunosuppression                               | 16 (18)                             | 17 (23)                           | 0.41     |
| Cause of sepsis                                 |                                     |                                   |          |
| Pneumonia                                       | 48 (53)                             | 36 (48)                           | 0.54     |
| Urosepsis                                       | 22 (24)                             | 23 (31)                           | 0.35     |
| Gastrointestinal/biliary                        | 21 (23)                             | 21 (28)                           | 0.47     |
| Nosocomial infection                            | 29 (32)                             | 24 (32)                           | 0.99     |
| ARDS                                            | 8 (9)                               | 7 (9)                             | 0.90     |
| SOFA score                                      | 11 (10–14)                          | 12 (9–14)                         | 0.31     |
| Mechanical ventilation                          | 65 (71)                             | 43 (57)                           | 0.06     |
| Renal replacement therapy                       | 38 (42)                             | 29 (39)                           | 0.69     |
| Vital signs & laboratory data                   |                                     |                                   |          |
| Body temperature, °C                            | 37.0 (36.7–37.9)                    | 37.4 (36.9–38.0)                  | 0.06     |
| Mean arterial pressure, mmHg                    | 61 (57–66)                          | 59 (52–66)                        | 0.18     |
| Respiratory rate, breaths/min                   | 28 (25–32)                          | 28 (24–34)                        | 0.81     |
| Bicarbonate, mEq/L                              | 18.7 (15.7–22.8)                    | 16.1 (12.7–18.6)                  | <0.001   |
| Creatinine, mg/dL                               | 1.5 (1.0–2.2)                       | 1.8 (1.2–2.6)                     | 0.04     |
| Platelet count, 1000/mm <sup>3</sup>            | 140 (91–190)                        | 112 (58–177)                      | 0.07     |
| Total bilirubin, mg/dL                          | 0.8 (0.5–1.7)                       | 0.7 (0.4–1.2)                     | 0.27     |
| C-reactive protein, mg/L                        | 133 (76–230)                        | 144 (89–250)                      | 0.53     |
| Lactate, mmol/L                                 | 3.9 (1.9–6.6)                       | 3.6 (2.0–7.2)                     | 0.61     |
| Cardiac troponin I, ng/L                        | 163 (63–689)                        | 211 (92–752)                      | 0.18     |
| Brain natriuretic peptide, pg/mL                | 518 (247–955)                       | 381 (153–1055)                    | 0.45     |
| Norepinephrine equivalent dose, µg/min          | 10.5 (5.3–21.2)                     | 10.5 (5.4–21.2)                   | 0.70     |
| Echocardiography (n = 44 / n = 34) <sup>1</sup> |                                     |                                   |          |
| Ejection fraction, %                            | 37 (30–44)                          | 39 (32–45)                        | 0.59     |

Data are presented as number (%) or median (interquartile range). The *p*-values were calculated using the Mann-Whitney *U* test or Student's *t*-test for continuous variables and using the chi-squared test or Fisher's exact test for categorical variables. ARDS: acute respiratory distress syndrome; SOFA: Sequential Organ Failure Assessment. <sup>1</sup> Echocardiography was performed for 44 patients in the treatment group and for 34 patients in the control group.

**Table S3.** Primary and secondary outcomes in the groups before matching.

|                                                   | <b>Treatment group<br/>(n = 91)</b> | <b>Control group<br/>(n = 75)</b> | <b><i>p</i></b> |
|---------------------------------------------------|-------------------------------------|-----------------------------------|-----------------|
| Primary outcome                                   |                                     |                                   |                 |
| ICU mortality                                     | 33 (36)                             | 34 (45)                           | 0.24            |
| Secondary outcomes                                |                                     |                                   |                 |
| Vasopressor weaning                               | 60 (66)                             | 45 (61)                           | 0.50            |
| Vasopressor-free days at day 28                   | 16.5 ± 12.1                         | 14.7 ± 12.3                       | 0.26            |
| Ventilator weaning (n = 65 / n = 43) <sup>1</sup> | 30 (46)                             | 11 (26)                           | 0.03            |
| Ventilator-free days at day 28                    | 9.0 ± 10.5                          | 5.4 ± 9.5                         | 0.06            |
| Superinfection                                    | 13 (14)                             | 15 (20)                           | 0.33            |

Data are presented as number (%) or mean ± standard deviation. The *p*-values were calculated using the Mann-Whitney *U* test or Student's *t*-test for continuous variables and using the chi-squared test or Fisher's exact test for categorical variables. ICU: intensive care unit. <sup>1</sup> Mechanical ventilation was applied for 65 patients in the treatment group and for 43 patients in the control group.

**Figure S1.** Standardized mean differences for variables before and after matching and IPTW-trimming.

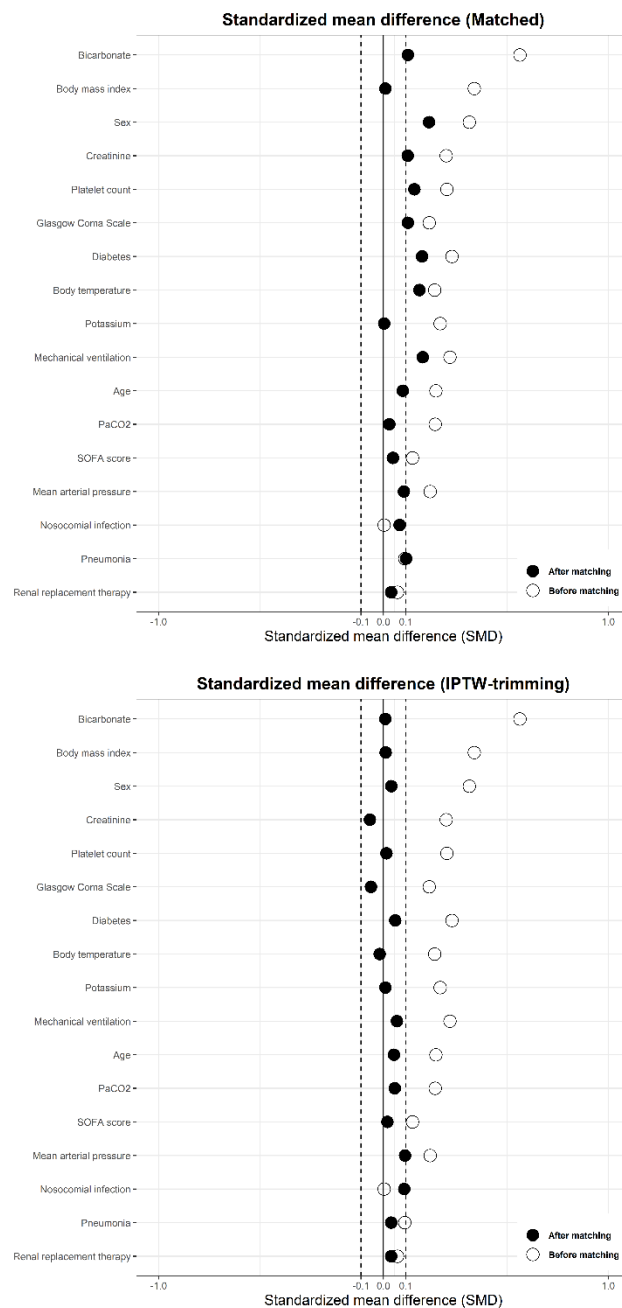

IPTW: inverse probability of treatment weighting; PaCO<sub>2</sub>: arterial partial pressure of carbon dioxide; SOFA: Sequential Organ Failure Assessment.

**Table S4.** Echocardiographic parameters among patients with chronic heart failure or chronic lung disease.

|                                     | <b>Treatment group</b> | <b>Control group</b> | <b><i>p</i></b> |
|-------------------------------------|------------------------|----------------------|-----------------|
| Chronic heart failure               | n = 4                  | n = 3                |                 |
| LV ejection fraction, %             | 29 (24–36)             | 41 (34–43)           | 0.16            |
| Mitral <i>E</i> wave, cm/s          | 71.0 (52.5–85.0)       | 105.0 (78.0–122.5)   | 0.29            |
| Mitral <i>E'</i> wave, cm/s         | 4.0 (4.0–4.5)          | 5.0 (4.0–8.0)        | 0.58            |
| <i>E/E'</i> ratio                   | 16.2 (13.9–20.1)       | 14.0 (13.4–17.8)     | 0.72            |
| Stroke volume, mL                   | 36 (29–38)             | 30 (29–37)           | >0.99           |
| Cardiac output, L/min               | 2.8 (2.3–3.1)          | 3.7 (2.9–3.8)        | 0.29            |
| Cardiac index, L/min/m <sup>2</sup> | 1.8 (1.4–2.1)          | 2.4 (2.0–2.5)        | 0.29            |
| Chronic lung disease                | n = 3                  | n = 5                |                 |
| LV ejection fraction, %             | 24 (22–28)             | 39 (37–39)           | 0.10            |
| Mitral <i>E</i> wave, cm/s          | 95.0 (69.0–99.0)       | 73.0 (65.0–95.0)     | >0.99           |
| Mitral <i>E'</i> wave, cm/s         | 6.0 (5.0–6.5)          | 5.0 (5.0–6.0)        | 0.76            |
| <i>E/E'</i> ratio                   | 13.6 (12.7–16.1)       | 13.0 (12.6–21.5)     | 0.88            |
| Stroke volume, mL                   | 35 (27–36)             | 27 (24–28)           | 0.88            |
| Cardiac output, L/min               | 2.8 (2.7–3.0)          | 3.3 (3.2–3.4)        | 0.07            |
| Cardiac index, L/min/m <sup>2</sup> | 1.7 (1.7–1.9)          | 2.2 (2.1–2.6)        | 0.04            |

Data are presented as median (interquartile range). The *p*-values were calculated using the Mann-Whitney *U* test.

LV: left ventricular.

**Table S5.** Primary and secondary outcomes in the matched cohort according to the presence of chronic heart failure.

|                                                  | <b>Chronic heart failure<br/>(n = 12)</b> | <b>No chronic heart failure<br/>(n = 106)</b> | <b><i>p</i></b> |
|--------------------------------------------------|-------------------------------------------|-----------------------------------------------|-----------------|
| Primary outcome                                  |                                           |                                               |                 |
| ICU mortality                                    | 5 (42)                                    | 40 (38)                                       | 0.77            |
| Secondary outcomes                               |                                           |                                               |                 |
| Vasopressor weaning                              | 7 (58)                                    | 68 (64)                                       | 0.76            |
| Vasopressor-free days at day 28                  | 14.8 ± 13.1                               | 15.8 ± 12.1                                   | 0.32            |
| Ventilator weaning (n = 9 / n = 64) <sup>1</sup> | 4 (44)                                    | 26 (41)                                       | >0.99           |
| Ventilator-free days at day 28                   | 10.6 ± 12.6                               | 8.5 ± 10.6                                    | 0.02            |
| Superinfection                                   | 1 (8)                                     | 16 (15)                                       | >0.99           |

Data are presented as number (%) or mean ± standard deviation. The *p*-values were calculated using the Mann-Whitney *U* test or Student's *t*-test for continuous variables and using the chi-squared test or Fisher's exact test for categorical variables. ICU: intensive care unit. <sup>1</sup> Mechanical ventilation was applied for 9 patients in the chronic heart failure group and for 64 patients in the no chronic heart failure group.

**Table S6.** Primary and secondary outcomes in the matched cohort according to recovery status from septic cardiomyopathy.

|                                                  | <b>Recovery<br/>(n = 17)</b> | <b>No recovery<br/>(n = 7)</b> | <b><i>p</i></b> |
|--------------------------------------------------|------------------------------|--------------------------------|-----------------|
| Primary outcome                                  |                              |                                |                 |
| ICU mortality                                    | 1 (6)                        | 3 (43)                         | 0.059           |
| Secondary outcomes                               |                              |                                |                 |
| Vasopressor weaning                              | 16 (94)                      | 3 (43)                         | 0.01            |
| Vasopressor-free days at day 28                  | 23.5 ± 6.3                   | 10.7 ± 13.5                    | 0.08            |
| Ventilator weaning (n = 11 / n = 5) <sup>1</sup> | 9 (82)                       | 2 (40)                         | 0.25            |
| Ventilator-free days at day 28                   | 16.3 ± 8.9                   | 10.0 ± 13.7                    | 0.73            |
| Superinfection                                   | 3 (18)                       | 1 (14)                         | >0.99           |

Data are presented as number (%) or mean ± standard deviation. The *p*-values were calculated using the Mann-Whitney *U* test or Student's *t*-test for continuous variables and using the chi-squared test or Fisher's exact test for categorical variables. ICU: intensive care unit. <sup>1</sup> Mechanical ventilation was applied for 11 patients in the recovery group and for 5 patients in the no recovery group.

**Table S7.** Comparing primary and secondary outcomes among treated and control patients who did and did not receive steroids at shock onset.

|                                                               | <b>Treatment group<br/>(n = 59)</b> | <b>Control group<br/>with steroids<br/>(n = 13)</b> | <b>Control group<br/>without steroids<br/>(n = 46)</b> | <b><i>p</i></b> |
|---------------------------------------------------------------|-------------------------------------|-----------------------------------------------------|--------------------------------------------------------|-----------------|
| Primary outcome                                               |                                     |                                                     |                                                        |                 |
| ICU mortality                                                 | 19 (32)                             | 8 (62)                                              | 18 (39)                                                | 0.14            |
| Secondary outcomes                                            |                                     |                                                     |                                                        |                 |
| Vasopressor weaning                                           | 39 (66)                             | 6 (46)                                              | 30 (65)                                                | 0.38            |
| Vasopressor-free days at day 28                               | 16.6 ± 12.1                         | 11.5 ± 13.0                                         | 15.9 ± 12.0                                            | 0.34            |
| Ventilator weaning<br>(n = 40 / n = 10 / n = 23) <sup>1</sup> | 21 (53)                             | 2 (20)                                              | 7 (30)                                                 | 0.08            |
| Ventilator-free days at day 28                                | 11.5 ± 11.3                         | 3.8 ± 8.1                                           | 6.0 ± 9.7                                              | 0.045           |
| Superinfection                                                | 6 (10)                              | 2 (15)                                              | 9 (20)                                                 | 0.39            |

Data are presented as number (%) or mean ± standard deviation. The *p*-values were calculated using the Kruskal-Wallis test for continuous variables and using the chi-squared test or Fisher's exact test for categorical variables. ICU: intensive care unit. <sup>1</sup> Mechanical ventilation was applied for 40 patients in the treatment group, 10 patients in the control group with steroids, and 23 patients in the control group without steroids.



**Table S8.** Serial analyses of clinical parameters during the first 4 days in the matched cohort.

|                                        | Treatment group<br>(n = 59) | Control group<br>(n = 59) | <i>p</i> |
|----------------------------------------|-----------------------------|---------------------------|----------|
| Day 2 (n = 59 / n = 53)                |                             |                           |          |
| Mean arterial pressure, mmHg           | 62 (52–66)                  | 60 (56–66)                | 0.85     |
| Creatinine, mg/dL                      | 1.3 (1.0–2.1)               | 1.3 (0.8–2.1)             | 0.62     |
| Platelet count, 1000/mm <sup>3</sup>   | 103 (68–163)                | 108 (61–182)              | 0.97     |
| Total bilirubin, mg/dL                 | 0.8 (0.5–2.2)               | 0.6 (0.4–1.2)             | 0.04     |
| C-reactive protein, mg/L               | 226 (137–280)               | 189 (124–288)             | 0.60     |
| Lactate, mmol/L                        | 3.8 (2.1–6.6)               | 2.7 (1.9–6.2)             | 0.19     |
| Glucose, mg/dL                         | 182 (135–238)               | 174 (147–222)             | 0.93     |
| Norepinephrine equivalent dose, µg/min | 7.7 (0–19.1)                | 9.7 (3.0–30.7)            | 0.29     |
| SOFA score                             | 12 (9–14)                   | 12 (8–14)                 | 0.88     |
| Net fluid retention <sup>1</sup> , mL  | 795 (375–1410)              | 1291 (318–2030)           | 0.12     |
| Day 3 (n = 54 / n = 44)                |                             |                           |          |
| Mean arterial pressure, mmHg           | 64 (52–72)                  | 59 (54–67)                | 0.40     |
| Creatinine, mg/dL                      | 1.2 (0.8–1.7)               | 1.0 (0.7–1.7)             | 0.46     |
| Platelet count, 1000/mm <sup>3</sup>   | 85 (43–149)                 | 88 (41–159)               | 0.93     |
| Total bilirubin, mg/dL                 | 1.0 (0.5–1.9)               | 0.6 (0.4–1.2)             | 0.04     |
| C-reactive protein, mg/L               | 173 (73–253)                | 211 (126–322)             | 0.04     |
| Lactate, mmol/L                        | 2.7 (2.0–4.8)               | 2.6 (1.6–7.3)             | 0.35     |
| Glucose, mg/dL                         | 173 (139–212)               | 179 (135–213)             | 0.89     |
| Norepinephrine equivalent dose, µg/min | 1.9 (0–12.8)                | 8.4 (0–18.8)              | 0.07     |
| SOFA score                             | 10 (7–14)                   | 12 (8–18)                 | 0.37     |
| Net fluid retention <sup>1</sup> , mL  | 530 (–86 to 1010)           | 1158 (610–2374)           | <0.001   |
| Day 4 (n = 46 / n = 36)                |                             |                           |          |
| Mean arterial pressure, mmHg           | 67 (55–81)                  | 60 (56–69)                | 0.26     |
| Creatinine, mg/dL                      | 1.1 (0.6–1.5)               | 1.0 (0.6–1.6)             | 0.82     |
| Platelet count, 1000/mm <sup>3</sup>   | 77 (50–145)                 | 77 (41–154)               | 0.89     |
| Total bilirubin, mg/dL                 | 1.0 (0.6–1.8)               | 0.6 (0.4–1.4)             | 0.08     |
| C-reactive protein, mg/L               | 106 (60–208)                | 199 (124–271)             | <0.001   |
| Lactate, mmol/L                        | 3.0 (1.8–4.8)               | 2.4 (1.3–5.9)             | 0.19     |
| Glucose, mg/dL                         | 162 (128–192)               | 155 (123–212)             | 0.91     |
| Norepinephrine equivalent dose, µg/min | 0 (0–10.5)                  | 4.4 (0–21.2)              | 0.08     |
| SOFA score                             | 10 (6–15)                   | 11 (6–24)                 | 0.40     |
| Net fluid retention <sup>1</sup> , mL  | 221 (–235 to 1053)          | 765 (–113 to 1646)        | 0.08     |
| Change relative to day 1               |                             |                           |          |
| C-reactive protein, day 4              | –25 (–116 to 46)            | 0 (–30 to 122)            | 0.004    |
| Norepinephrine equivalent dose, day 4  | –8.4 (–21.0 to 0)           | –4.1 (–10.8 to 2.0)       | 0.04     |
| SOFA score, day 4                      | –2 (–5 to 1)                | –1 (–3 to 4)              | 0.09     |

Data are presented as median (interquartile range). The *p*-values were calculated using the Mann-Whitney *U* test or Student's *t*-test. SOFA: Sequential Organ Failure Assessment. <sup>1</sup> Net fluid retention was calculated as the difference between all fluid intake and all fluid output (urine volume, dialysis volume, drainage volume, and stool weight).
